# Supplementary material for: Reactions of a β-diketiminate zinc hydride complex with heterocumulenes
Source: Royal Society of Chemistry journal article supplement (doi:10.1039/c0cc01329c), 2010-01-01
Supplement: c0cc01329c.pdf [file c0cc01329c.pdf]

## **Supporting information**

### **Reactions of a $\beta$ -Diketiminato Zinc Hydride Complex with Heterocumulenes**

*Stephan Schulz,\* Tamara Eisenmann, Sarah Schmidt, Dieter Bläser, U. Westphal, and  
Roland Boese*

## Experimental Section

Manipulations were performed in a glove box under an Ar-atmosphere or with standard Schlenk techniques. Dry solvents were obtained from a solvent purification system (MBraun) and degassed prior to use. MesnacnacZnH was prepared according to the literature method,[1]  $C(Ni-Pr)_2$  and *t*-BuNCO were commercially available from Acros and dried before use. A Bruker Avance 500 spectrometer was used for NMR spectroscopy.  $^1H$  and  $^{13}C\{^1H\}$  NMR spectra were referenced to internal  $C_6D_5H$  ( $^1H$ :  $\delta = 7.154$ ;  $^{13}C$ :  $\delta = 128.0$ ). IR spectra were recorded on a Alpha-T FT-IR spectrometer with a single reflection ATR sampling module. Melting points were measured in sealed capillaries and were not corrected. Elemental analyses were performed at the *Elementaranalyse Labor* of the University of Essen.

### **[MesnacnacZnO<sub>2</sub>CH]<sub>2</sub> (2)**

A solution of 0.40 g (1.0 mmol) MesnacnacZnH in 50 mL of toluene was cooled to -78 °C, evacuated and pressurized with one atmosphere of CO<sub>2</sub>. The closed reaction vessel was slowly warmed to ambient temperature and stirred for additional 10 min. Storage of the solution at 25 °C gave colorless crystals of **2** within 12 h, yield 0.39 g (88 %).

M.p. 215 - 217 °C. – Anal. Found (calcd) for C<sub>48</sub>H<sub>60</sub>N<sub>4</sub>O<sub>4</sub>Zn<sub>2</sub> (887.77 g/mol): H, 6.77 (6.81); C, 64.87 (64.94); N, 6.24 (6.31). – IR:  $\nu = 2918, 2854, 1697, 1598, 1521, 1453, 1390, 1370, 1259, 1202, 1085, 1012, 856\text{ cm}^{-1}$ . –  $^1H$  NMR (500 MHz, C<sub>6</sub>D<sub>6</sub>, 298 K):  $\delta = 1.51$  (s, 6H,  $\beta$ -CH<sub>3</sub>), 2.00 (s, 12H, *o*-Ar CH<sub>3</sub>), 2.28 (s, 6H, *p*-Ar CH<sub>3</sub>), 4.72 (s, 1H,  $\gamma$ -CH), 6.75 (s, 4H, *m*-Ar CH), 8.01 (s, 1H, HCO<sub>2</sub>). –  $^{13}C$  NMR (500 MHz, C<sub>6</sub>D<sub>6</sub>, 298 K):  $\delta = 18.1$  (*o*-Ar CH<sub>3</sub>), 21.0 ( $\beta$ -CCH<sub>3</sub>), 22.9 (*p*-Ar CH<sub>3</sub>), 94.1 ( $\gamma$ -C), 129.4 (*m*-Ar), 131.8 (*o*-Ar), 133.2 (*p*-Ar), 144.4 (*ipso*-Ar), 167.4 (CO<sub>2</sub>), 168.3 ( $\beta$ -C).

### **[MesnacnacZn(*t*-BuN)C(H)O] (3)**

0.10 g (1.0 mmol) *t*-BuNCO was added at ambient temperature via syringe to a solution of 0.40 g (1.0 mmol) MesnacnacZnH in 50 mL of toluene and stirred for 6 h. The solvent was removed in vacuum yielding a slightly yellow solid, which was washed with *n*-pentane. The remaining colorless solid was analytically pure **3**, yield 0.42 g (83 %).

This journal is (c) The Royal Society of Chemistry 2010

M.p. 160 °C (decomp.) – Anal. Found (calcd) for C<sub>28</sub>H<sub>39</sub>N<sub>3</sub>OZn (499.01 g/mol): H, 7.82 (7.88); C, 67.32 (67.40); N, 8.34 (8.42). – IR:  $\nu$  = 2962, 2918, 2862, 1604, 1545, 1515, 1450, 1391, 1338, 1259, 1197, 1083, 1010, 855, 792, 746, 705, 464 cm<sup>-1</sup>. – <sup>1</sup>H NMR (300 MHz, C<sub>6</sub>D<sub>6</sub>, 298 K):  $\delta$  = 0.67 (s, 9 H, CMe<sub>3</sub>), 1.65 (s, 6 H,  $\beta$ -CH<sub>3</sub>), 2.12 (s, 6 H, *p*-Ar CH<sub>3</sub>), 2.32 (s, 12 H, *o*-Ar CH<sub>3</sub>), 4.92 (s, 1 H,  $\gamma$ -CH), 6.81 (s, 4 H, *m*-Ar CH), 7.91 (s, 1H, NCOH). – <sup>13</sup>C NMR (125 MHz, C<sub>6</sub>D<sub>6</sub>, 298 K):  $\delta$  = 18.7 (*o*-Ar CH<sub>3</sub>), 20.9 ( $\beta$ -CCH<sub>3</sub>), 22.8 (*p*-Ar CH<sub>3</sub>), 28.7 (CMe<sub>3</sub>), 31.4 (CMe<sub>3</sub>), 94.6 ( $\gamma$ -C), 128.7 (*m*-Ar), 132.8 (*o*-Ar), 133.8 (*p*-Ar), 146.0 (*ipso*-Ar), 167.3 (NCO), 168.4 ( $\beta$ -C). – C<sub>28</sub>H<sub>39</sub>N<sub>3</sub>OZn (499.01).

#### **[MesnacnacZn(*i*-PrN)<sub>2</sub>CH] (4)**

0.26 g (1.0 mmol) (*i*-PrN)<sub>2</sub>C was added at ambient temperature via syringe to a solution of 0.79 g (1.0 mmol) MesnacnacZnH in 50 mL of toluene and stirred for additional 2 h. Thereafter, the solvent was evacuated in vacuum and the remaining solid dissolved in *n*-hexane and stored at -30 °C. Colorless crystals of **4** were formed within 72 h, yield 0.70 g (62 %).

M.p. 225 °C. – Anal. Found (calcd) for C<sub>30</sub>H<sub>44</sub>N<sub>4</sub>Zn (526.08 g/mol): H, 8.39 (8.43); C, 68.42 (68.50); N, 10.48 (10.65). – IR:  $\nu$  = 2962, 2918, 1644, 1555, 1521, 1450, 1396, 1375, 1259, 1198, 1094, 1015, 857 cm<sup>-1</sup>. – <sup>1</sup>H NMR (500 MHz, C<sub>6</sub>D<sub>6</sub>, 298 K):  $\delta$  = 0.90 (d, 12H, <sup>3</sup>J<sub>HH</sub> = 6.9 Hz, CH(CH<sub>3</sub>)<sub>2</sub>), 1.67 (s, 6H,  $\beta$ -CH<sub>3</sub>), 2.13 (s, 6H, *p*-Ar CH<sub>3</sub>), 2.33 (s, 12H, *o*-Ar CH<sub>3</sub>), 3.20 (sep, 2H, <sup>3</sup>J<sub>HH</sub> = 6.4 Hz, CH(CH<sub>3</sub>)<sub>2</sub>), 4.88 (s, 1H, CH), 6.82 (s, 4H, *m*-Ar CH), 7.30 (HCN<sub>2</sub>). – <sup>13</sup>C NMR (500 MHz, C<sub>6</sub>D<sub>6</sub>, 298 K):  $\delta$  = 19.4 (*o*-Ar CH<sub>3</sub>), 21.2 ( $\beta$ -CCH<sub>3</sub>), 23.3 (*p*-Ar CH<sub>3</sub>), 26.2 (CH(CH<sub>3</sub>)<sub>2</sub>), 48.8 (CH(CH<sub>3</sub>)<sub>2</sub>), 94.5 ( $\gamma$ -C), 129.5 (*m*-Ar), 131.9 (*o*-Ar), 133.7 (*p*-Ar), 145.9 (*ipso*-Ar), 165.4 (CN<sub>2</sub>), 168.0 ( $\beta$ -C).

*Crystal structure determination*

Data were collected on a Bruker AXS SMART APEX CCD diffractometer for **2** and **4** (MoK $\alpha$  radiation,  $\lambda = 0.71073$  Å). The structures were solved by Direct Methods SHELXL-97 [2] and refined by full-matrix least-squares on  $F^2$ . Semi-empirical absorption corrections were applied. All non-hydrogen atoms were refined anisotropically and hydrogen atoms by a riding model (SHELXL-97, Program for Crystal Structure Refinement).[3]

CCDC 776239 (**2**) and 776240 (**4**) contain the supplementary crystallographic data for this paper. These data can be obtained free of charge from The Cambridge Crystallographic Data Centre *via* [www.ccdc.cam.ac.uk/data\\_request/cif](http://www.ccdc.cam.ac.uk/data_request/cif).

**References**

[1] S. Schulz, T. Eisenmann, D. Schuchmann, M. Bolte, M. Kirchner, R. Boese, J. Spielmann and S. Harder, *Z. Naturforsch.* 2009, **64b**, 1397.

[2] G. M. Sheldrick, *Acta Crystallogr.* 1990, **A46**, 467.

[3] G. M. Sheldrick, SHELXL-97, Program for the Refinement of Crystal Structures University of Göttingen, Göttingen (Germany) **1997**.

## IR spectroscopic studies

IR spectra of pure **2** as well as solutions of **2** in THF and toluene were recorded. Pure **2** shows two strong absorption bands due to  $\nu_{\text{as}}(\text{CO})$  and  $\nu_{\text{sy}}(\text{CO})$ . The difference  $\Delta\nu$  between both is typically used in order to verify the binding mode of the formate group. While a large difference of about  $200\text{ cm}^{-1}$  indicates a  $\eta^1$ -coordination, difference of  $100\text{ cm}^{-1}$  are typical for bridging and chelating formate groups. **2** shows a difference of about  $99\text{ cm}^{-1}$ , which points to a bridging/chelating mode as observed in the solid state structure. No further symmetrical or asymmetrical CO absorption bands could be identified; however, they might be overlapped by absorption bands of the diketiminato group as a comparison of **2** (in red) with the starting hydride (in blue) shows (spectrum 1).

### Spectrum 1

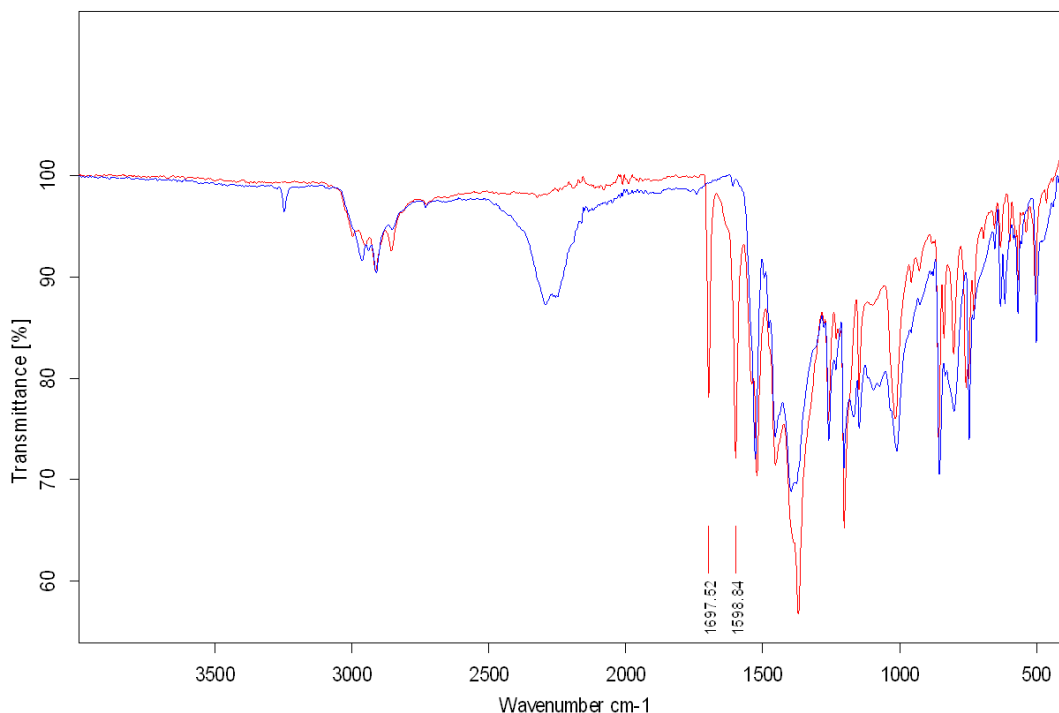

|                                                |                |                                    |            |
|------------------------------------------------|----------------|------------------------------------|------------|
| D:\Spektren_AK_Schulz\Tamarai\MesnacnacZnH-2.0 | MesnacnacZnH-2 | ATR platinum Diamond 1 Refl        | 31/08/2009 |
| D:\Spektren_AK_Schulz\Probe ohne Lsm.0         | Probe ohne Lsm | Instrument type and / or accessory | 30/06/2010 |

IR spectra recorded in solution not really provide any useful information in order to distinguish between both coordination modes (spectrum 2). However, two bands observed at

This journal is (c) The Royal Society of Chemistry 2010

1591 and 1697  $\text{cm}^{-1}$  (enlarged representation see spectrum 3) correspond well to those observed in crystalline **2** (1599, 1698  $\text{cm}^{-1}$ ).

### Spectra 2 and 3

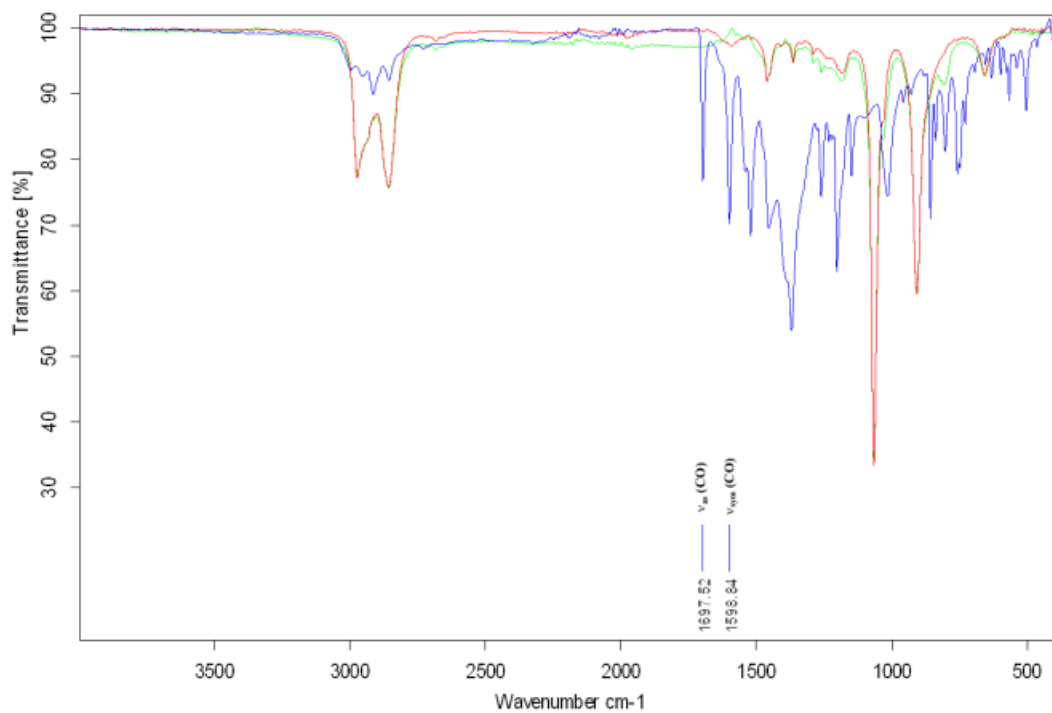

|                                                |                   |                                    |            |
|------------------------------------------------|-------------------|------------------------------------|------------|
| D:\Spektren_AK_Schulz\MEAS\Probe ohne Lsm.0    | Probe ohne Lsm    | Instrument type and / or accessory | 30/06/2010 |
| D:\Spektren_AK_Schulz\MEAS\Probe in THF konz.0 | Probe in THF konz | Instrument type and / or accessory | 30/06/2010 |
| D:\Spektren_AK_Schulz\THF.0                    | THF               | Instrument type and / or accessory | 30/06/2010 |

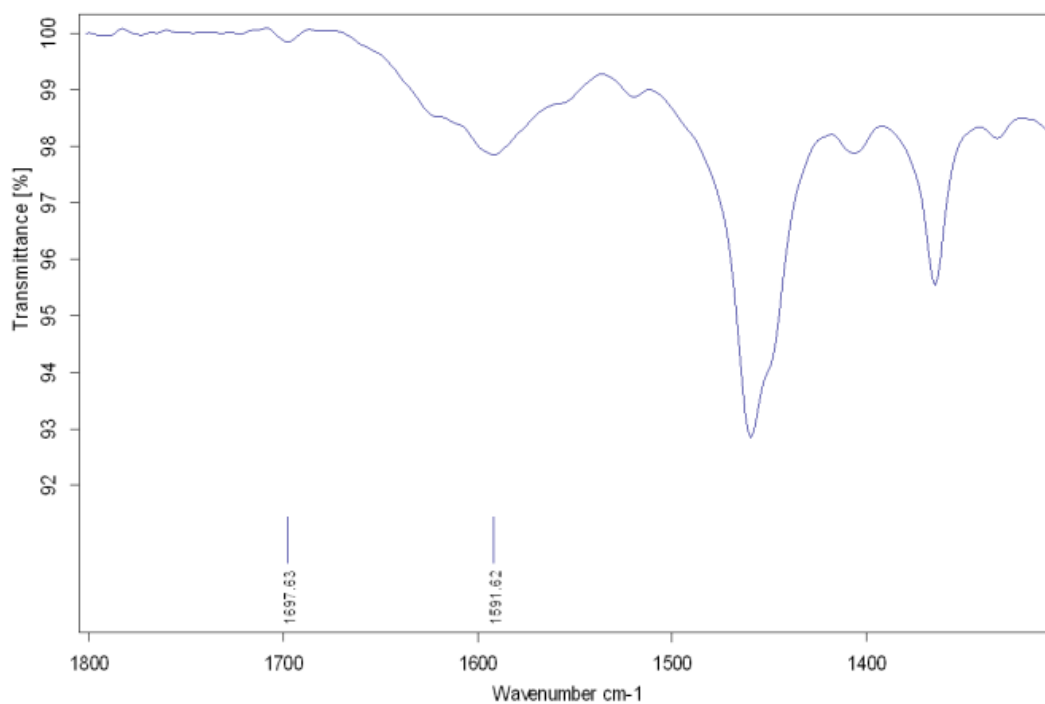

|                                                 |                   |                                    |            |
|-------------------------------------------------|-------------------|------------------------------------|------------|
| D:\Spektren_AK_Schultz\MEAS\Probe in THF konz.0 | Probe in THF konz | Instrument type and / or accessory | 30/06/2010 |
|-------------------------------------------------|-------------------|------------------------------------|------------|

Seite 1 von 1

## Computational Calculations

DFT calculations were carried out with the Gaussian09 suite of programs (Gaussian 09, Revision A.02, M. J. Frisch, G. W. Trucks, H. B. Schlegel, G. E. Scuseria, M. A. Robb, J. R. Cheeseman, G. Scalmani, V. Barone, B. Mennucci, G. A. Petersson, H. Nakatsuji, M. Caricato, X. Li, H. P. Hratchian, A. F. Izmaylov, J. Bloino, G. Zheng, J. L. Sonnenberg, M. Hada, M. Ehara, K. Toyota, R. Fukuda, J. Hasegawa, M. Ishida, T. Nakajima, Y. Honda, O. Kitao, H. Nakai, T. Vreven, J. A. Montgomery, Jr., J. E. Peralta, F. Ogliaro, M. Bearpark, J. J. Heyd, E. Brothers, K. N. Kudin, V. N. Staroverov, R. Kobayashi, J. Normand, K. Raghavachari, A. Rendell, J. C. Burant, S. S. Iyengar, J. Tomasi, M. Cossi, N. Rega, J. M. Millam, M. Klene, J. E. Knox, J. B. Cross, V. Bakken, C. Adamo, J. Jaramillo, R. Gomperts, R. E. Stratmann, O. Yazyev, A. J. Austin, R. Cammi, C. Pomelli, J. W. Ochterski, R. L. Martin, K. Morokuma, V. G. Zakrzewski, G. A. Voth, P. Salvador, J. J. Dannenberg, S. Dapprich, A. D. Daniels, O. Farkas, J. B. Foresman, J. V. Ortiz, J. Cioslowski, and D. J. Fox, Gaussian, Inc., Wallingford CT, 2009).

The molecular structures and energies of the monomeric **2'** and dimeric form **2''** of compound **2** were obtained by performing a complete energy optimization of all geometric parameters at

This journal is (c) The Royal Society of Chemistry 2010

the b3lyp/sdd level (input keywords “# b3lyp/sdd opt pop=nbo”), using the atomic coordinates of the crystal structure determinations of **4** (for **2'**) and **2** (for **2''**) as starting points. Population analysis was carried out with the NBO module as implemented in Gaussian03. The final molecular structure and list of the final atomic coordinates and energy, selected bond distances, and NBO atomic populations are given below.



Calculated parameters for 2'

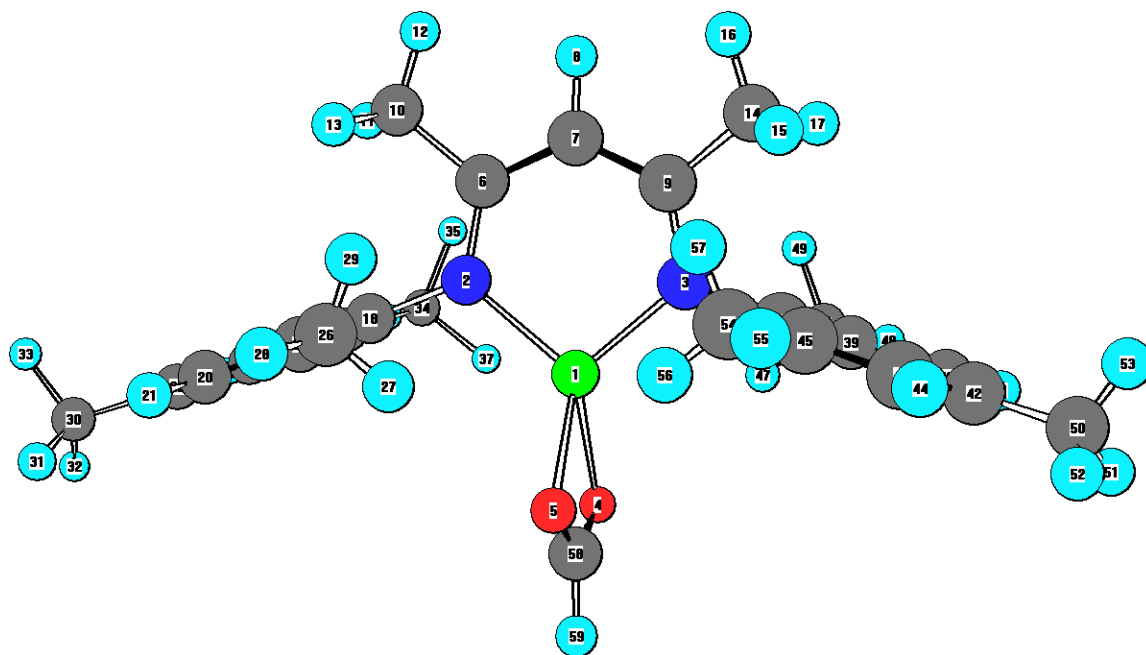

HF=-2971.0363126

| ! Optimized Parameters !    |            |        |            |       |
|-----------------------------|------------|--------|------------|-------|
| ! (Angstroms and Degrees) ! |            |        |            |       |
| ! Name                      | Definition | Value  | Derivative | Info. |
| ! R1                        | R(1,2)     | 1.9609 | -DE/DX =   | 0.0 ! |
| ! R2                        | R(1,3)     | 1.9609 | -DE/DX =   | 0.0 ! |
| ! R3                        | R(1,4)     | 2.0969 | -DE/DX =   | 0.0 ! |
| ! R4                        | R(1,5)     | 2.0969 | -DE/DX =   | 0.0 ! |
| ! R5                        | R(1,58)    | 2.4    | -DE/DX =   | 0.0 ! |
| ! R6                        | R(2,6)     | 1.3348 | -DE/DX =   | 0.0 ! |
| ! R7                        | R(2,18)    | 1.4304 | -DE/DX =   | 0.0 ! |
| ! R8                        | R(3,9)     | 1.3348 | -DE/DX =   | 0.0 ! |
| ! R9                        | R(3,38)    | 1.4304 | -DE/DX =   | 0.0 ! |
| ! R10                       | R(4,58)    | 1.2613 | -DE/DX =   | 0.0 ! |
| ! R11                       | R(5,58)    | 1.2613 | -DE/DX =   | 0.0 ! |
| ! R12                       | R(6,7)     | 1.4153 | -DE/DX =   | 0.0 ! |
| ! R13                       | R(6,10)    | 1.5157 | -DE/DX =   | 0.0 ! |
| ! R14                       | R(7,8)     | 1.0891 | -DE/DX =   | 0.0 ! |
| ! R15                       | R(7,9)     | 1.4153 | -DE/DX =   | 0.0 ! |
| ! R16                       | R(9,14)    | 1.5157 | -DE/DX =   | 0.0 ! |
| ! R17                       | R(10,11)   | 1.101  | -DE/DX =   | 0.0 ! |
| ! R18                       | R(10,12)   | 1.0971 | -DE/DX =   | 0.0 ! |
| ! R19                       | R(10,13)   | 1.101  | -DE/DX =   | 0.0 ! |
| ! R20                       | R(14,15)   | 1.101  | -DE/DX =   | 0.0 ! |
| ! R21                       | R(14,16)   | 1.0971 | -DE/DX =   | 0.0 ! |
| ! R22                       | R(14,17)   | 1.101  | -DE/DX =   | 0.0 ! |
| ! R23                       | R(18,19)   | 1.4116 | -DE/DX =   | 0.0 ! |
| ! R24                       | R(18,25)   | 1.4127 | -DE/DX =   | 0.0 ! |
| ! R25                       | R(19,20)   | 1.4016 | -DE/DX =   | 0.0 ! |
| ! R26                       | R(19,26)   | 1.5093 | -DE/DX =   | 0.0 ! |
| ! R27                       | R(20,21)   | 1.0944 | -DE/DX =   | 0.0 ! |
| ! R28                       | R(20,22)   | 1.4    | -DE/DX =   | 0.0 ! |
| ! R29                       | R(22,23)   | 1.4011 | -DE/DX =   | 0.0 ! |
| ! R30                       | R(22,30)   | 1.51   | -DE/DX =   | 0.0 ! |
| ! R31                       | R(23,24)   | 1.0945 | -DE/DX =   | 0.0 ! |
| ! R32                       | R(23,25)   | 1.4005 | -DE/DX =   | 0.0 ! |
| ! R33                       | R(25,34)   | 1.5093 | -DE/DX =   | 0.0 ! |
| ! R34                       | R(26,27)   | 1.1035 | -DE/DX =   | 0.0 ! |
| ! R35                       | R(26,28)   | 1.0996 | -DE/DX =   | 0.0 ! |
| ! R36                       | R(26,29)   | 1.1019 | -DE/DX =   | 0.0 ! |
| ! R37                       | R(30,31)   | 1.1006 | -DE/DX =   | 0.0 ! |
| ! R38                       | R(30,32)   | 1.1014 | -DE/DX =   | 0.0 ! |
| ! R39                       | R(30,33)   | 1.1045 | -DE/DX =   | 0.0 ! |
| ! R40                       | R(34,35)   | 1.1019 | -DE/DX =   | 0.0 ! |
| ! R41                       | R(34,36)   | 1.0996 | -DE/DX =   | 0.0 ! |
| ! R42                       | R(34,37)   | 1.1035 | -DE/DX =   | 0.0 ! |
| ! R43                       | R(38,39)   | 1.412  | -DE/DX =   | 0.0 ! |
| ! R44                       | R(38,45)   | 1.4122 | -DE/DX =   | 0.0 ! |
| ! R45                       | R(39,40)   | 1.4012 | -DE/DX =   | 0.0 ! |
| ! R46                       | R(39,46)   | 1.5093 | -DE/DX =   | 0.0 ! |
| ! R47                       | R(40,41)   | 1.0944 | -DE/DX =   | 0.0 ! |
| ! R48                       | R(40,42)   | 1.4005 | -DE/DX =   | 0.0 ! |
| ! R49                       | R(42,43)   | 1.4006 | -DE/DX =   | 0.0 ! |
| ! R50                       | R(42,50)   | 1.51   | -DE/DX =   | 0.0 ! |
| ! R51                       | R(43,44)   | 1.0945 | -DE/DX =   | 0.0 ! |
| ! R52                       | R(43,45)   | 1.401  | -DE/DX =   | 0.0 ! |
| ! R53                       | R(45,54)   | 1.5093 | -DE/DX =   | 0.0 ! |
| ! R54                       | R(46,47)   | 1.1035 | -DE/DX =   | 0.0 ! |
| ! R55                       | R(46,48)   | 1.0996 | -DE/DX =   | 0.0 ! |
| ! R56                       | R(46,49)   | 1.1019 | -DE/DX =   | 0.0 ! |
| ! R57                       | R(50,51)   | 1.1009 | -DE/DX =   | 0.0 ! |
| ! R58                       | R(50,52)   | 1.101  | -DE/DX =   | 0.0 ! |
| ! R59                       | R(50,53)   | 1.1046 | -DE/DX =   | 0.0 ! |
| ! R60                       | R(54,55)   | 1.0996 | -DE/DX =   | 0.0 ! |

## Supplementary Material (ESI) for Chemical Communications

This journal is (c) The Royal Society of Chemistry 2010

|       |          |        |          |     |   |
|-------|----------|--------|----------|-----|---|
| ! R61 | R(54,56) | 1.1035 | -DE/DX = | 0.0 | ! |
| ! R62 | R(54,57) | 1.1019 | -DE/DX = | 0.0 | ! |
| ! R63 | R(58,59) | 1.1101 | -DE/DX = | 0.0 | ! |

Standard orientation:

| Center<br>Number | Atomic<br>Number | Atomic<br>Type | Coordinates (Angstroms) |           |           |
|------------------|------------------|----------------|-------------------------|-----------|-----------|
|                  |                  |                | X                       | Y         | Z         |
| 1                | 30               | 0              | 0.000084                | -0.436614 | 0.000817  |
| 2                | 7                | 0              | -1.518377               | 0.804154  | 0.001006  |
| 3                | 7                | 0              | 1.518344                | 0.804430  | 0.000085  |
| 4                | 8                | 0              | -0.000374               | -2.221314 | -1.100068 |
| 5                | 8                | 0              | 0.001216                | -2.221155 | 1.101916  |
| 6                | 6                | 0              | -1.286793               | 2.118673  | 0.001180  |
| 7                | 6                | 0              | -0.000174               | 2.708347  | 0.000811  |
| 8                | 1                | 0              | -0.000272               | 3.797456  | 0.000962  |
| 9                | 6                | 0              | 1.286554                | 2.118902  | 0.000192  |
| 10               | 6                | 0              | -2.470936               | 3.064770  | 0.001876  |
| 11               | 1                | 0              | -3.108926               | 2.891422  | -0.878506 |
| 12               | 1                | 0              | -2.147034               | 4.112942  | 0.002115  |
| 13               | 1                | 0              | -3.108319               | 2.890776  | 0.882567  |
| 14               | 6                | 0              | 2.470540                | 3.065190  | -0.000403 |
| 15               | 1                | 0              | 3.108714                | 2.891617  | 0.879800  |
| 16               | 1                | 0              | 2.146469                | 4.113311  | -0.000231 |
| 17               | 1                | 0              | 3.107792                | 2.891620  | -0.881276 |
| 18               | 6                | 0              | -2.848027               | 0.276848  | 0.001004  |
| 19               | 6                | 0              | -3.479983               | -0.027697 | 1.225942  |
| 20               | 6                | 0              | -4.766083               | -0.584284 | 1.199453  |
| 21               | 1                | 0              | -5.255217               | -0.818378 | 2.150040  |
| 22               | 6                | 0              | -5.434119               | -0.859140 | 0.000186  |
| 23               | 6                | 0              | -4.765891               | -0.581831 | -1.199629 |
| 24               | 1                | 0              | -5.255057               | -0.814394 | -2.150741 |
| 25               | 6                | 0              | -3.480815               | -0.025553 | -1.225286 |
| 26               | 6                | 0              | -2.766982               | 0.194720  | 2.537471  |
| 27               | 1                | 0              | -1.873220               | -0.448654 | 2.608552  |
| 28               | 1                | 0              | -3.421944               | -0.045210 | 3.387511  |
| 29               | 1                | 0              | -2.420788               | 1.233915  | 2.657826  |
| 30               | 6                | 0              | -6.833516               | -1.426398 | -0.003939 |
| 31               | 1                | 0              | -7.062277               | -1.947580 | 0.938091  |
| 32               | 1                | 0              | -6.979169               | -2.138721 | -0.831220 |
| 33               | 1                | 0              | -7.587701               | -0.629051 | -0.128005 |
| 34               | 6                | 0              | -2.767349               | 0.199533  | -2.536103 |
| 35               | 1                | 0              | -2.422117               | 1.239252  | -2.654688 |
| 36               | 1                | 0              | -3.421626               | -0.039782 | -3.386843 |
| 37               | 1                | 0              | -1.872894               | -0.442796 | -2.607583 |
| 38               | 6                | 0              | 2.848049                | 0.277266  | -0.000520 |
| 39               | 6                | 0              | 3.479684                | -0.026609 | -1.226306 |
| 40               | 6                | 0              | 4.765164                | -0.583546 | -1.200766 |
| 41               | 1                | 0              | 5.253669                | -0.817413 | -2.151795 |
| 42               | 6                | 0              | 5.433785                | -0.859572 | -0.001587 |
| 43               | 6                | 0              | 4.766321                | -0.582955 | 1.198311  |
| 44               | 1                | 0              | 5.255773                | -0.816443 | 2.148973  |
| 45               | 6                | 0              | 3.481026                | -0.026101 | 1.224916  |
| 46               | 6                | 0              | 2.765821                | 0.196846  | -2.537188 |
| 47               | 1                | 0              | 1.871750                | -0.446122 | -2.607951 |
| 48               | 1                | 0              | 3.420069                | -0.042846 | -3.387845 |
| 49               | 1                | 0              | 2.419946                | 1.236247  | -2.656658 |
| 50               | 6                | 0              | 6.833497                | -1.426062 | -0.001579 |
| 51               | 1                | 0              | 7.026125                | -2.029937 | -0.901713 |
| 52               | 1                | 0              | 7.013440                | -2.061176 | 0.879622  |
| 53               | 1                | 0              | 7.590372                | -0.621777 | 0.018320  |
| 54               | 6                | 0              | 2.768374                | 0.197884  | 2.536368  |
| 55               | 1                | 0              | 3.423476                | -0.041292 | 3.386514  |
| 56               | 1                | 0              | 1.874485                | -0.445208 | 2.608282  |
| 57               | 1                | 0              | 2.422423                | 1.237274  | 2.655671  |
| 58               | 6                | 0              | 0.000560                | -2.836610 | 0.000967  |
| 59               | 1                | 0              | 0.000802                | -3.946681 | 0.001045  |

## Summary of Natural Population Analysis:

| Atom | No | Natural Charge | Natural Population |          |         |          |
|------|----|----------------|--------------------|----------|---------|----------|
|      |    |                | Core               | Valence  | Rydberg | Total    |
| Zn   | 1  | 1.22083        | 17.99727           | 10.77831 | 0.00359 | 28.77917 |
| N    | 2  | -0.73679       | 1.99925            | 5.72160  | 0.01593 | 7.73679  |
| N    | 3  | -0.73677       | 1.99925            | 5.72159  | 0.01593 | 7.73677  |
| O    | 4  | -0.73561       | 1.99978            | 6.72581  | 0.01002 | 8.73561  |
| O    | 5  | -0.73563       | 1.99978            | 6.72583  | 0.01002 | 8.73563  |
| C    | 6  | 0.32994        | 1.99894            | 3.65019  | 0.02093 | 5.67006  |
| C    | 7  | -0.41861       | 1.99886            | 4.40327  | 0.01648 | 6.41861  |
| H    | 8  | 0.22133        | 0.00000            | 0.77612  | 0.00255 | 0.77867  |
| C    | 9  | 0.32995        | 1.99894            | 3.65018  | 0.02093 | 5.67005  |
| C    | 10 | -0.66106       | 1.99919            | 4.65440  | 0.00746 | 6.66106  |
| H    | 11 | 0.23860        | 0.00000            | 0.75903  | 0.00237 | 0.76140  |
| H    | 12 | 0.22725        | 0.00000            | 0.77077  | 0.00197 | 0.77275  |
| H    | 13 | 0.23866        | 0.00000            | 0.75896  | 0.00237 | 0.76134  |
| C    | 14 | -0.66106       | 1.99919            | 4.65440  | 0.00746 | 6.66106  |
| H    | 15 | 0.23862        | 0.00000            | 0.75900  | 0.00237 | 0.76138  |
| H    | 16 | 0.22725        | 0.00000            | 0.77077  | 0.00197 | 0.77275  |
| H    | 17 | 0.23864        | 0.00000            | 0.75899  | 0.00237 | 0.76136  |
| C    | 18 | 0.15241        | 1.99869            | 3.82677  | 0.02213 | 5.84759  |
| C    | 19 | -0.03107       | 1.99879            | 4.01669  | 0.01560 | 6.03107  |
| C    | 20 | -0.21851       | 1.99882            | 4.20509  | 0.01460 | 6.21851  |
| H    | 21 | 0.21669        | 0.00000            | 0.78043  | 0.00287 | 0.78331  |
| C    | 22 | -0.02922       | 1.99885            | 4.01527  | 0.01510 | 6.02922  |
| C    | 23 | -0.21781       | 1.99882            | 4.20431  | 0.01468 | 6.21781  |
| H    | 24 | 0.21647        | 0.00000            | 0.78065  | 0.00289 | 0.78353  |
| C    | 25 | -0.03095       | 1.99879            | 4.01659  | 0.01557 | 6.03095  |
| C    | 26 | -0.63809       | 1.99921            | 4.62989  | 0.00899 | 6.63809  |
| H    | 27 | 0.23625        | 0.00000            | 0.76052  | 0.00323 | 0.76375  |
| H    | 28 | 0.22120        | 0.00000            | 0.77654  | 0.00225 | 0.77880  |
| H    | 29 | 0.22170        | 0.00000            | 0.77584  | 0.00246 | 0.77830  |
| C    | 30 | -0.63178       | 1.99921            | 4.62392  | 0.00866 | 6.63178  |
| H    | 31 | 0.22053        | 0.00000            | 0.77709  | 0.00238 | 0.77947  |
| H    | 32 | 0.22231        | 0.00000            | 0.77524  | 0.00244 | 0.77769  |
| H    | 33 | 0.22529        | 0.00000            | 0.77208  | 0.00262 | 0.77471  |
| C    | 34 | -0.63805       | 1.99921            | 4.62985  | 0.00899 | 6.63805  |
| H    | 35 | 0.22169        | 0.00000            | 0.77585  | 0.00246 | 0.77831  |
| H    | 36 | 0.22120        | 0.00000            | 0.77655  | 0.00225 | 0.77880  |
| H    | 37 | 0.23623        | 0.00000            | 0.76054  | 0.00323 | 0.76377  |
| C    | 38 | 0.15240        | 1.99869            | 3.82678  | 0.02213 | 5.84760  |
| C    | 39 | -0.03102       | 1.99879            | 4.01664  | 0.01559 | 6.03102  |
| C    | 40 | -0.21823       | 1.99882            | 4.20478  | 0.01464 | 6.21823  |
| H    | 41 | 0.21660        | 0.00000            | 0.78052  | 0.00288 | 0.78340  |
| C    | 42 | -0.02921       | 1.99885            | 4.01526  | 0.01510 | 6.02921  |
| C    | 43 | -0.21811       | 1.99882            | 4.20464  | 0.01465 | 6.21811  |
| H    | 44 | 0.21657        | 0.00000            | 0.78055  | 0.00288 | 0.78343  |
| C    | 45 | -0.03099       | 1.99879            | 4.01662  | 0.01558 | 6.03099  |
| C    | 46 | -0.63807       | 1.99921            | 4.62987  | 0.00899 | 6.63807  |
| H    | 47 | 0.23624        | 0.00000            | 0.76054  | 0.00323 | 0.76376  |
| H    | 48 | 0.22120        | 0.00000            | 0.77655  | 0.00225 | 0.77880  |
| H    | 49 | 0.22169        | 0.00000            | 0.77584  | 0.00246 | 0.77831  |
| C    | 50 | -0.63172       | 1.99921            | 4.62386  | 0.00866 | 6.63172  |
| H    | 51 | 0.22122        | 0.00000            | 0.77637  | 0.00240 | 0.77878  |
| H    | 52 | 0.22152        | 0.00000            | 0.77607  | 0.00241 | 0.77848  |
| H    | 53 | 0.22534        | 0.00000            | 0.77204  | 0.00262 | 0.77466  |
| C    | 54 | -0.63807       | 1.99921            | 4.62987  | 0.00899 | 6.63807  |
| H    | 55 | 0.22120        | 0.00000            | 0.77655  | 0.00225 | 0.77880  |
| H    | 56 | 0.23625        | 0.00000            | 0.76052  | 0.00323 | 0.76375  |
| H    | 57 | 0.22169        | 0.00000            | 0.77585  | 0.00246 | 0.77831  |
| C    | 58 | 0.68356        | 1.99953            | 3.26904  | 0.04788 | 5.31644  |
| H    | 59 | 0.13792        | 0.00000            | 0.85800  | 0.00407 | 0.86208  |

Supplementary Material (ESI) for Chemical Communications

This journal is (c) The Royal Society of Chemistry 2010

=====  
\* Total \*      0.00000      73.97075      159.52574      0.50350      234.00000

Calculated parameters for 2''

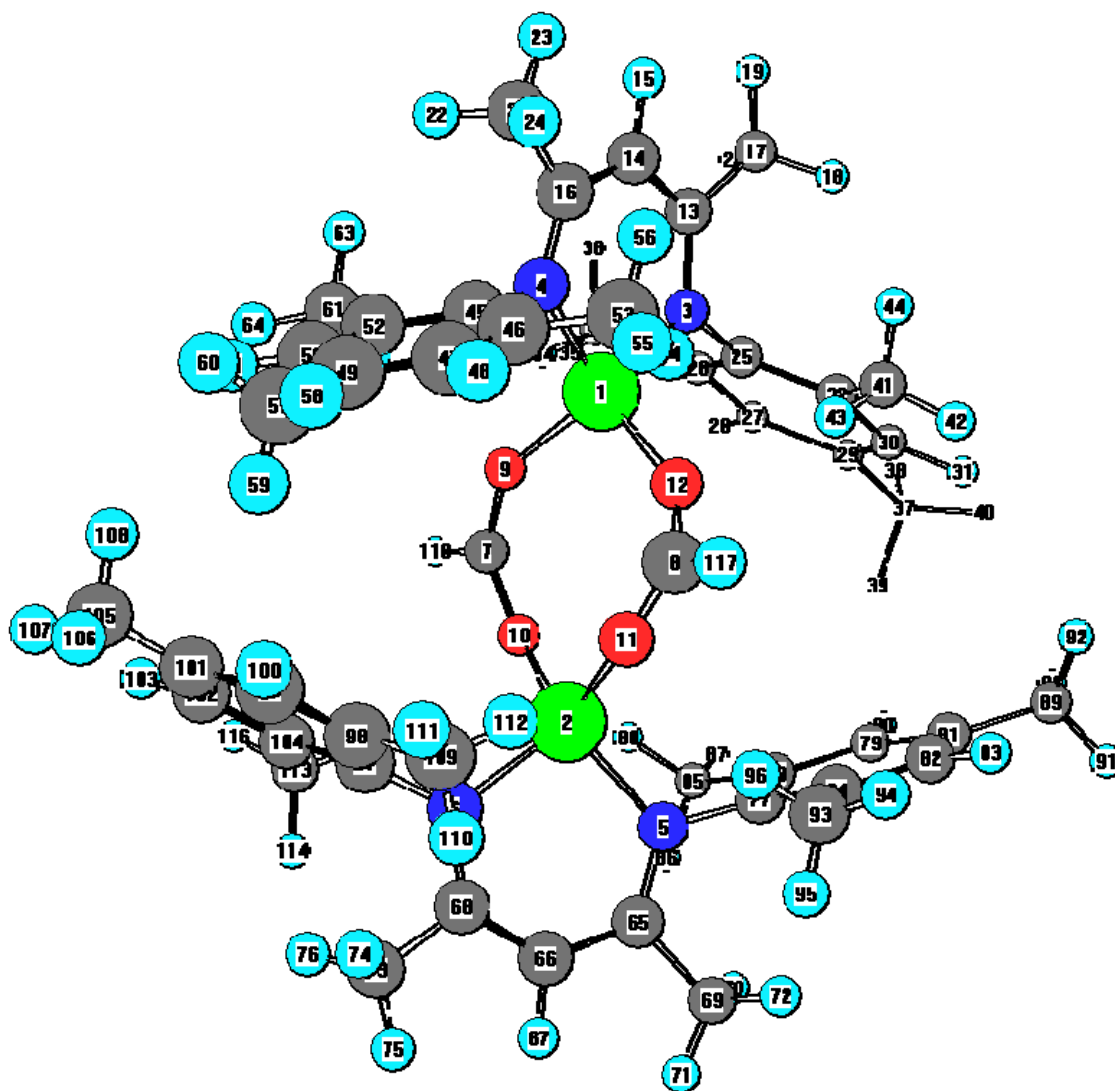

HF=-5942.1111045

| -----                       |            |        |            |       |   |
|-----------------------------|------------|--------|------------|-------|---|
| ! Optimized Parameters !    |            |        |            |       |   |
| ! (Angstroms and Degrees) ! |            |        |            |       |   |
| -----                       |            |        |            |       |   |
| ! Name                      | Definition | Value  | Derivative | Info. | ! |
| -----                       |            |        |            |       |   |
| ! R1                        | R(1,3)     | 1.9934 | -DE/DX =   | 0.0   | ! |
| ! R2                        | R(1,4)     | 1.9944 | -DE/DX =   | 0.0   | ! |
| ! R3                        | R(1,9)     | 1.9984 | -DE/DX =   | 0.0   | ! |
| ! R4                        | R(1,11)    | 3.7349 | -DE/DX =   | 0.0   | ! |
| ! R5                        | R(1,12)    | 1.9996 | -DE/DX =   | 0.0   | ! |
| ! R6                        | R(2,5)     | 1.9936 | -DE/DX =   | 0.0   | ! |
| ! R7                        | R(2,6)     | 1.9942 | -DE/DX =   | 0.0   | ! |
| ! R8                        | R(2,10)    | 1.9994 | -DE/DX =   | 0.0   | ! |
| ! R9                        | R(2,11)    | 1.9977 | -DE/DX =   | 0.0   | ! |
| ! R10                       | R(3,13)    | 1.3336 | -DE/DX =   | 0.0   | ! |
| ! R11                       | R(3,25)    | 1.4293 | -DE/DX =   | 0.0   | ! |
| ! R12                       | R(4,16)    | 1.3332 | -DE/DX =   | 0.0   | ! |
| ! R13                       | R(4,45)    | 1.4291 | -DE/DX =   | 0.0   | ! |
| ! R14                       | R(5,65)    | 1.3336 | -DE/DX =   | 0.0   | ! |
| ! R15                       | R(5,77)    | 1.4291 | -DE/DX =   | 0.0   | ! |
| ! R16                       | R(6,68)    | 1.3333 | -DE/DX =   | 0.0   | ! |
| ! R17                       | R(6,97)    | 1.4292 | -DE/DX =   | 0.0   | ! |
| ! R18                       | R(7,9)     | 1.2536 | -DE/DX =   | 0.0   | ! |
| ! R19                       | R(7,10)    | 1.2529 | -DE/DX =   | 0.0   | ! |
| ! R20                       | R(7,11)    | 3.9495 | -DE/DX =   | 0.0   | ! |
| ! R21                       | R(7,34)    | 3.1082 | -DE/DX =   | 0.0   | ! |
| ! R22                       | R(7,118)   | 1.1146 | -DE/DX =   | 0.0   | ! |
| ! R23                       | R(8,11)    | 1.2537 | -DE/DX =   | 0.0   | ! |
| ! R24                       | R(8,12)    | 1.253  | -DE/DX =   | 0.0   | ! |
| ! R25                       | R(8,117)   | 1.1146 | -DE/DX =   | 0.0   | ! |
| ! R26                       | R(9,11)    | 3.9325 | -DE/DX =   | 0.0   | ! |
| ! R27                       | R(9,34)    | 2.5441 | -DE/DX =   | 0.0   | ! |
| ! R28                       | R(9,62)    | 2.5245 | -DE/DX =   | 0.0   | ! |
| ! R29                       | R(10,11)   | 3.2726 | -DE/DX =   | 0.0   | ! |
| ! R30                       | R(13,14)   | 1.414  | -DE/DX =   | 0.0   | ! |
| ! R31                       | R(13,17)   | 1.5175 | -DE/DX =   | 0.0   | ! |
| ! R32                       | R(14,15)   | 1.089  | -DE/DX =   | 0.0   | ! |
| ! R33                       | R(14,16)   | 1.4142 | -DE/DX =   | 0.0   | ! |
| ! R34                       | R(16,21)   | 1.5175 | -DE/DX =   | 0.0   | ! |
| ! R35                       | R(17,18)   | 1.101  | -DE/DX =   | 0.0   | ! |
| ! R36                       | R(17,19)   | 1.0972 | -DE/DX =   | 0.0   | ! |
| ! R37                       | R(17,20)   | 1.1008 | -DE/DX =   | 0.0   | ! |
| ! R38                       | R(21,22)   | 1.101  | -DE/DX =   | 0.0   | ! |
| ! R39                       | R(21,23)   | 1.0972 | -DE/DX =   | 0.0   | ! |
| ! R40                       | R(21,24)   | 1.1006 | -DE/DX =   | 0.0   | ! |
| ! R41                       | R(25,26)   | 1.4146 | -DE/DX =   | 0.0   | ! |
| ! R42                       | R(25,32)   | 1.4112 | -DE/DX =   | 0.0   | ! |
| ! R43                       | R(26,27)   | 1.4003 | -DE/DX =   | 0.0   | ! |
| ! R44                       | R(26,33)   | 1.5098 | -DE/DX =   | 0.0   | ! |
| ! R45                       | R(27,28)   | 1.0949 | -DE/DX =   | 0.0   | ! |
| ! R46                       | R(27,29)   | 1.4013 | -DE/DX =   | 0.0   | ! |
| ! R47                       | R(29,30)   | 1.3994 | -DE/DX =   | 0.0   | ! |
| ! R48                       | R(29,37)   | 1.5102 | -DE/DX =   | 0.0   | ! |
| ! R49                       | R(30,31)   | 1.094  | -DE/DX =   | 0.0   | ! |
| ! R50                       | R(30,32)   | 1.4022 | -DE/DX =   | 0.0   | ! |
| ! R51                       | R(32,41)   | 1.5093 | -DE/DX =   | 0.0   | ! |
| ! R52                       | R(33,34)   | 1.1007 | -DE/DX =   | 0.0   | ! |
| ! R53                       | R(33,35)   | 1.1    | -DE/DX =   | 0.0   | ! |
| ! R54                       | R(33,36)   | 1.1035 | -DE/DX =   | 0.0   | ! |
| ! R55                       | R(37,38)   | 1.102  | -DE/DX =   | 0.0   | ! |
| ! R56                       | R(37,39)   | 1.1043 | -DE/DX =   | 0.0   | ! |
| ! R57                       | R(37,40)   | 1.1004 | -DE/DX =   | 0.0   | ! |
| ! R58                       | R(41,42)   | 1.0997 | -DE/DX =   | 0.0   | ! |
| ! R59                       | R(41,43)   | 1.1013 | -DE/DX =   | 0.0   | ! |



This journal is (c) The Royal Society of Chemistry 2010

|        |            |        |          |     |   |
|--------|------------|--------|----------|-----|---|
| ! R60  | R(41,44)   | 1.1033 | -DE/DX = | 0.0 | ! |
| ! R61  | R(45,46)   | 1.4123 | -DE/DX = | 0.0 | ! |
| ! R62  | R(45,52)   | 1.4139 | -DE/DX = | 0.0 | ! |
| ! R63  | R(46,47)   | 1.4026 | -DE/DX = | 0.0 | ! |
| ! R64  | R(46,53)   | 1.5099 | -DE/DX = | 0.0 | ! |
| ! R65  | R(47,48)   | 1.0945 | -DE/DX = | 0.0 | ! |
| ! R66  | R(47,49)   | 1.3989 | -DE/DX = | 0.0 | ! |
| ! R67  | R(49,50)   | 1.4017 | -DE/DX = | 0.0 | ! |
| ! R68  | R(49,57)   | 1.5099 | -DE/DX = | 0.0 | ! |
| ! R69  | R(50,51)   | 1.0947 | -DE/DX = | 0.0 | ! |
| ! R70  | R(50,52)   | 1.3997 | -DE/DX = | 0.0 | ! |
| ! R71  | R(52,61)   | 1.5093 | -DE/DX = | 0.0 | ! |
| ! R72  | R(53,54)   | 1.1002 | -DE/DX = | 0.0 | ! |
| ! R73  | R(53,55)   | 1.1    | -DE/DX = | 0.0 | ! |
| ! R74  | R(53,56)   | 1.1037 | -DE/DX = | 0.0 | ! |
| ! R75  | R(57,58)   | 1.1004 | -DE/DX = | 0.0 | ! |
| ! R76  | R(57,59)   | 1.1038 | -DE/DX = | 0.0 | ! |
| ! R77  | R(57,60)   | 1.1022 | -DE/DX = | 0.0 | ! |
| ! R78  | R(61,62)   | 1.1014 | -DE/DX = | 0.0 | ! |
| ! R79  | R(61,63)   | 1.1031 | -DE/DX = | 0.0 | ! |
| ! R80  | R(61,64)   | 1.0998 | -DE/DX = | 0.0 | ! |
| ! R81  | R(65,66)   | 1.414  | -DE/DX = | 0.0 | ! |
| ! R82  | R(65,69)   | 1.5175 | -DE/DX = | 0.0 | ! |
| ! R83  | R(66,67)   | 1.089  | -DE/DX = | 0.0 | ! |
| ! R84  | R(66,68)   | 1.4142 | -DE/DX = | 0.0 | ! |
| ! R85  | R(68,73)   | 1.5174 | -DE/DX = | 0.0 | ! |
| ! R86  | R(69,70)   | 1.1008 | -DE/DX = | 0.0 | ! |
| ! R87  | R(69,71)   | 1.0972 | -DE/DX = | 0.0 | ! |
| ! R88  | R(69,72)   | 1.1008 | -DE/DX = | 0.0 | ! |
| ! R89  | R(73,74)   | 1.1012 | -DE/DX = | 0.0 | ! |
| ! R90  | R(73,75)   | 1.0972 | -DE/DX = | 0.0 | ! |
| ! R91  | R(73,76)   | 1.1006 | -DE/DX = | 0.0 | ! |
| ! R92  | R(77,78)   | 1.4109 | -DE/DX = | 0.0 | ! |
| ! R93  | R(77,84)   | 1.4151 | -DE/DX = | 0.0 | ! |
| ! R94  | R(78,79)   | 1.4026 | -DE/DX = | 0.0 | ! |
| ! R95  | R(78,85)   | 1.5092 | -DE/DX = | 0.0 | ! |
| ! R96  | R(79,80)   | 1.0939 | -DE/DX = | 0.0 | ! |
| ! R97  | R(79,81)   | 1.3989 | -DE/DX = | 0.0 | ! |
| ! R98  | R(81,82)   | 1.4016 | -DE/DX = | 0.0 | ! |
| ! R99  | R(81,89)   | 1.5102 | -DE/DX = | 0.0 | ! |
| ! R100 | R(82,83)   | 1.0949 | -DE/DX = | 0.0 | ! |
| ! R101 | R(82,84)   | 1.3998 | -DE/DX = | 0.0 | ! |
| ! R102 | R(84,93)   | 1.5098 | -DE/DX = | 0.0 | ! |
| ! R103 | R(85,86)   | 1.1034 | -DE/DX = | 0.0 | ! |
| ! R104 | R(85,87)   | 1.0997 | -DE/DX = | 0.0 | ! |
| ! R105 | R(85,88)   | 1.1012 | -DE/DX = | 0.0 | ! |
| ! R106 | R(89,90)   | 1.1002 | -DE/DX = | 0.0 | ! |
| ! R107 | R(89,91)   | 1.1028 | -DE/DX = | 0.0 | ! |
| ! R108 | R(89,92)   | 1.1037 | -DE/DX = | 0.0 | ! |
| ! R109 | R(93,94)   | 1.1    | -DE/DX = | 0.0 | ! |
| ! R110 | R(93,95)   | 1.1035 | -DE/DX = | 0.0 | ! |
| ! R111 | R(93,96)   | 1.1005 | -DE/DX = | 0.0 | ! |
| ! R112 | R(97,98)   | 1.413  | -DE/DX = | 0.0 | ! |
| ! R113 | R(97,104)  | 1.4131 | -DE/DX = | 0.0 | ! |
| ! R114 | R(98,99)   | 1.4007 | -DE/DX = | 0.0 | ! |
| ! R115 | R(98,109)  | 1.5093 | -DE/DX = | 0.0 | ! |
| ! R116 | R(99,100)  | 1.0946 | -DE/DX = | 0.0 | ! |
| ! R117 | R(99,101)  | 1.4009 | -DE/DX = | 0.0 | ! |
| ! R118 | R(101,102) | 1.3999 | -DE/DX = | 0.0 | ! |
| ! R119 | R(101,105) | 1.51   | -DE/DX = | 0.0 | ! |
| ! R120 | R(102,103) | 1.0947 | -DE/DX = | 0.0 | ! |
| ! R121 | R(102,104) | 1.4018 | -DE/DX = | 0.0 | ! |
| ! R122 | R(104,113) | 1.51   | -DE/DX = | 0.0 | ! |
| ! R123 | R(105,106) | 1.1014 | -DE/DX = | 0.0 | ! |
| ! R124 | R(105,107) | 1.1008 | -DE/DX = | 0.0 | ! |
| ! R125 | R(105,108) | 1.1045 | -DE/DX = | 0.0 | ! |
| ! R126 | R(109,110) | 1.103  | -DE/DX = | 0.0 | ! |

## Supplementary Material (ESI) for Chemical Communications

This journal is (c) The Royal Society of Chemistry 2010

|   |      |            |        |          |     |   |
|---|------|------------|--------|----------|-----|---|
| ! | R127 | R(109,111) | 1.0998 | -DE/DX = | 0.0 | ! |
| ! | R128 | R(109,112) | 1.1015 | -DE/DX = | 0.0 | ! |
| ! | R129 | R(113,114) | 1.1038 | -DE/DX = | 0.0 | ! |
| ! | R130 | R(113,115) | 1.1004 | -DE/DX = | 0.0 | ! |
| ! | R131 | R(113,116) | 1.1    | -DE/DX = | 0.0 | ! |

## Standard orientation:

| Center<br>Number | Atomic<br>Number | Atomic<br>Type | Coordinates (Angstroms) |           |           |
|------------------|------------------|----------------|-------------------------|-----------|-----------|
|                  |                  |                | X                       | Y         | Z         |
| 1                | 30               | 0              | 0.303365                | 2.221392  | -0.014122 |
| 2                | 30               | 0              | -0.314117               | -2.220641 | -0.016174 |
| 3                | 7                | 0              | 1.953769                | 3.284479  | -0.359898 |
| 4                | 7                | 0              | -0.974757               | 3.702900  | 0.372039  |
| 5                | 7                | 0              | 1.031358                | -3.645555 | 0.349773  |
| 6                | 7                | 0              | -1.912535               | -3.355190 | -0.382967 |
| 7                | 6                | 0              | -0.057442               | 0.019097  | -2.178627 |
| 8                | 6                | 0              | -0.056350               | -0.004736 | 2.137452  |
| 9                | 8                | 0              | -0.140041               | 1.148324  | -1.640645 |
| 10               | 8                | 0              | 0.062436                | -1.100329 | -1.628907 |
| 11               | 8                | 0              | -0.476726               | -1.055776 | 1.598626  |
| 12               | 8                | 0              | 0.393973                | 1.026825  | 1.586916  |
| 13               | 6                | 0              | 1.920800                | 4.613754  | -0.257747 |
| 14               | 6                | 0              | 0.771547                | 5.372449  | 0.063402  |
| 15               | 1                | 0              | 0.932794                | 6.449079  | 0.093192  |
| 16               | 6                | 0              | -0.554416               | 4.967788  | 0.342719  |
| 17               | 6                | 0              | 3.197145                | 5.398186  | -0.499429 |
| 18               | 1                | 0              | 3.996569                | 5.060840  | 0.178221  |
| 19               | 1                | 0              | 3.039068                | 6.473424  | -0.349038 |
| 20               | 1                | 0              | 3.571717                | 5.238672  | -1.522162 |
| 21               | 6                | 0              | -1.551619               | 6.077383  | 0.620379  |
| 22               | 1                | 0              | -2.393660               | 6.028733  | -0.087255 |
| 23               | 1                | 0              | -1.081797               | 7.065594  | 0.539922  |
| 24               | 1                | 0              | -1.987871               | 5.976841  | 1.625832  |
| 25               | 6                | 0              | 3.151174                | 2.613050  | -0.757771 |
| 26               | 6                | 0              | 3.418680                | 2.412502  | -2.132297 |
| 27               | 6                | 0              | 4.579021                | 1.719284  | -2.498184 |
| 28               | 1                | 0              | 4.785959                | 1.569030  | -3.562784 |
| 29               | 6                | 0              | 5.476979                | 1.214823  | -1.548017 |
| 30               | 6                | 0              | 5.180097                | 1.417818  | -0.195602 |
| 31               | 1                | 0              | 5.862971                | 1.029550  | 0.565873  |
| 32               | 6                | 0              | 4.030260                | 2.103440  | 0.221561  |
| 33               | 6                | 0              | 2.474098                | 2.937480  | -3.186664 |
| 34               | 1                | 0              | 1.439245                | 2.620780  | -2.986081 |
| 35               | 1                | 0              | 2.763592                | 2.580724  | -4.186104 |
| 36               | 1                | 0              | 2.463571                | 4.040476  | -3.219053 |
| 37               | 6                | 0              | 6.708122                | 0.452534  | -1.976747 |
| 38               | 1                | 0              | 7.223226                | 0.951592  | -2.813470 |
| 39               | 1                | 0              | 6.450259                | -0.564609 | -2.320952 |
| 40               | 1                | 0              | 7.427430                | 0.347710  | -1.150618 |
| 41               | 6                | 0              | 3.741440                | 2.295777  | 1.690430  |
| 42               | 1                | 0              | 4.499106                | 1.792632  | 2.308604  |
| 43               | 1                | 0              | 2.752447                | 1.893576  | 1.960519  |
| 44               | 1                | 0              | 3.732511                | 3.362720  | 1.971042  |
| 45               | 6                | 0              | -2.324688               | 3.388051  | 0.719860  |
| 46               | 6                | 0              | -2.676473               | 3.205515  | 2.075460  |
| 47               | 6                | 0              | -3.996427               | 2.848004  | 2.387391  |
| 48               | 1                | 0              | -4.266769               | 2.708464  | 3.438809  |
| 49               | 6                | 0              | -4.971440               | 2.665069  | 1.401074  |
| 50               | 6                | 0              | -4.591443               | 2.846041  | 0.064103  |
| 51               | 1                | 0              | -5.335073               | 2.706803  | -0.727101 |
| 52               | 6                | 0              | -3.286505               | 3.198811  | -0.299089 |
| 53               | 6                | 0              | -1.656856               | 3.397321  | 3.172423  |
| 54               | 1                | 0              | -0.730732               | 2.843573  | 2.957526  |
| 55               | 1                | 0              | -2.053558               | 3.059402  | 4.141184  |
| 56               | 1                | 0              | -1.368975               | 4.456797  | 3.285969  |
| 57               | 6                | 0              | -6.382400               | 2.259758  | 1.754384  |
| 58               | 1                | 0              | -6.573797               | 2.355659  | 2.833720  |
| 59               | 1                | 0              | -6.576719               | 1.209784  | 1.474702  |

|     |   |   |           |           |           |
|-----|---|---|-----------|-----------|-----------|
| 60  | 1 | 0 | -7.125579 | 2.875836  | 1.222329  |
| 61  | 6 | 0 | -2.913557 | 3.376339  | -1.750778 |
| 62  | 1 | 0 | -2.083680 | 2.710343  | -2.035064 |
| 63  | 1 | 0 | -2.577119 | 4.404715  | -1.965632 |
| 64  | 1 | 0 | -3.770245 | 3.159938  | -2.405602 |
| 65  | 6 | 0 | 0.681185  | -4.929018 | 0.257719  |
| 66  | 6 | 0 | -0.616003 | -5.392272 | -0.061954 |
| 67  | 1 | 0 | -0.717306 | -6.476309 | -0.085794 |
| 68  | 6 | 0 | -1.807427 | -4.683718 | -0.341954 |
| 69  | 6 | 0 | 1.731754  | -5.994165 | 0.511708  |
| 70  | 1 | 0 | 2.592513  | -5.861044 | -0.161524 |
| 71  | 1 | 0 | 1.322381  | -7.001460 | 0.365004  |
| 72  | 1 | 0 | 2.127994  | -5.922808 | 1.536227  |
| 73  | 6 | 0 | -3.043235 | -5.523995 | -0.605246 |
| 74  | 1 | 0 | -3.841777 | -5.275161 | 0.110957  |
| 75  | 1 | 0 | -2.821850 | -6.595685 | -0.525917 |
| 76  | 1 | 0 | -3.453445 | -5.322845 | -1.606533 |
| 77  | 6 | 0 | 2.349732  | -3.275811 | 0.758953  |
| 78  | 6 | 0 | 3.333440  | -2.989442 | -0.211073 |
| 79  | 6 | 0 | 4.606136  | -2.585518 | 0.218200  |
| 80  | 1 | 0 | 5.367843  | -2.366893 | -0.535862 |
| 81  | 6 | 0 | 4.927476  | -2.450697 | 1.573009  |
| 82  | 6 | 0 | 3.926839  | -2.729059 | 2.514167  |
| 83  | 1 | 0 | 4.151103  | -2.624297 | 3.580740  |
| 84  | 6 | 0 | 2.642275  | -3.137247 | 2.136565  |
| 85  | 6 | 0 | 3.024002  | -3.117209 | -1.682693 |
| 86  | 1 | 0 | 2.781717  | -4.156705 | -1.962246 |
| 87  | 1 | 0 | 3.880587  | -2.796739 | -2.293423 |
| 88  | 1 | 0 | 2.151157  | -2.507327 | -1.963561 |
| 89  | 6 | 0 | 6.300320  | -2.005340 | 2.017553  |
| 90  | 1 | 0 | 6.991300  | -1.914395 | 1.166311  |
| 91  | 1 | 0 | 6.742599  | -2.715318 | 2.736205  |
| 92  | 1 | 0 | 6.261001  | -1.024264 | 2.521576  |
| 93  | 6 | 0 | 1.590838  | -3.425469 | 3.181011  |
| 94  | 1 | 0 | 1.944566  | -3.142731 | 4.183460  |
| 95  | 1 | 0 | 1.324461  | -4.495831 | 3.213969  |
| 96  | 1 | 0 | 0.659662  | -2.878701 | 2.968797  |
| 97  | 6 | 0 | -3.152884 | -2.729176 | -0.718222 |
| 98  | 6 | 0 | -4.031441 | -2.317925 | 0.309221  |
| 99  | 6 | 0 | -5.223403 | -1.671850 | -0.042647 |
| 100 | 1 | 0 | -5.906849 | -1.364413 | 0.755207  |
| 101 | 6 | 0 | -5.565059 | -1.409693 | -1.375672 |
| 102 | 6 | 0 | -4.670056 | -1.817505 | -2.371813 |
| 103 | 1 | 0 | -4.912551 | -1.622600 | -3.421342 |
| 104 | 6 | 0 | -3.467028 | -2.471533 | -2.071668 |
| 105 | 6 | 0 | -6.840185 | -0.678918 | -1.722219 |
| 106 | 1 | 0 | -7.653822 | -0.930120 | -1.023692 |
| 107 | 1 | 0 | -7.180909 | -0.917839 | -2.741349 |
| 108 | 1 | 0 | -6.698545 | 0.415374  | -1.673350 |
| 109 | 6 | 0 | -3.692960 | -2.570930 | 1.758142  |
| 110 | 1 | 0 | -3.592147 | -3.647665 | 1.975224  |
| 111 | 1 | 0 | -4.472482 | -2.166018 | 2.419883  |
| 112 | 1 | 0 | -2.732328 | -2.105545 | 2.030091  |
| 113 | 6 | 0 | -2.531024 | -2.897442 | -3.177377 |
| 114 | 1 | 0 | -2.497582 | -3.995066 | -3.288775 |
| 115 | 1 | 0 | -1.499641 | -2.572264 | -2.973872 |
| 116 | 1 | 0 | -2.848547 | -2.478953 | -4.143883 |
| 117 | 1 | 0 | -0.086892 | 0.012705  | 3.251457  |
| 118 | 1 | 0 | -0.094735 | 0.011311  | -3.292579 |

## Summary of Natural Population Analysis:

| Atom | No | Natural Charge | Natural Population |          |         |          |
|------|----|----------------|--------------------|----------|---------|----------|
|      |    |                | Core               | Valence  | Rydberg | Total    |
| Zn   | 1  | 1.27313        | 17.99729           | 10.72585 | 0.00373 | 28.72687 |
| Zn   | 2  | 1.27291        | 17.99729           | 10.72606 | 0.00374 | 28.72709 |
| N    | 3  | -0.73296       | 1.99926            | 5.71727  | 0.01642 | 7.73296  |
| N    | 4  | -0.73214       | 1.99926            | 5.71644  | 0.01643 | 7.73214  |
| N    | 5  | -0.73280       | 1.99926            | 5.71712  | 0.01642 | 7.73280  |
| N    | 6  | -0.73219       | 1.99926            | 5.71649  | 0.01644 | 7.73219  |
| C    | 7  | 0.76425        | 1.99950            | 3.19067  | 0.04558 | 5.23575  |
| C    | 8  | 0.76385        | 1.99950            | 3.19097  | 0.04568 | 5.23615  |
| O    | 9  | -0.76360       | 1.99971            | 6.75403  | 0.00985 | 8.76360  |
| O    | 10 | -0.76450       | 1.99971            | 6.75493  | 0.00986 | 8.76450  |
| O    | 11 | -0.76357       | 1.99971            | 6.75401  | 0.00985 | 8.76357  |
| O    | 12 | -0.76446       | 1.99971            | 6.75489  | 0.00985 | 8.76446  |
| C    | 13 | 0.32767        | 1.99894            | 3.65209  | 0.02131 | 5.67233  |
| C    | 14 | -0.42270       | 1.99886            | 4.40705  | 0.01679 | 6.42270  |
| H    | 15 | 0.21800        | 0.00000            | 0.77941  | 0.00259 | 0.78200  |
| C    | 16 | 0.32789        | 1.99894            | 3.65184  | 0.02133 | 5.67211  |
| C    | 17 | -0.66008       | 1.99919            | 4.65339  | 0.00750 | 6.66008  |
| H    | 18 | 0.23627        | 0.00000            | 0.76131  | 0.00242 | 0.76373  |
| H    | 19 | 0.22598        | 0.00000            | 0.77202  | 0.00199 | 0.77402  |
| H    | 20 | 0.23545        | 0.00000            | 0.76212  | 0.00244 | 0.76455  |
| C    | 21 | -0.65997       | 1.99919            | 4.65330  | 0.00748 | 6.65997  |
| H    | 22 | 0.23632        | 0.00000            | 0.76127  | 0.00241 | 0.76368  |
| H    | 23 | 0.22600        | 0.00000            | 0.77201  | 0.00199 | 0.77400  |
| H    | 24 | 0.23515        | 0.00000            | 0.76240  | 0.00244 | 0.76485  |
| C    | 25 | 0.15436        | 1.99868            | 3.82465  | 0.02230 | 5.84564  |
| C    | 26 | -0.03405       | 1.99879            | 4.01960  | 0.01566 | 6.03405  |
| C    | 27 | -0.21991       | 1.99882            | 4.20637  | 0.01472 | 6.21991  |
| H    | 28 | 0.21427        | 0.00000            | 0.78281  | 0.00293 | 0.78573  |
| C    | 29 | -0.03260       | 1.99884            | 4.01857  | 0.01519 | 6.03260  |
| C    | 30 | -0.21679       | 1.99882            | 4.20331  | 0.01466 | 6.21679  |
| H    | 31 | 0.21461        | 0.00000            | 0.78227  | 0.00313 | 0.78539  |
| C    | 32 | -0.02959       | 1.99878            | 4.01505  | 0.01575 | 6.02959  |
| C    | 33 | -0.63918       | 1.99920            | 4.63109  | 0.00890 | 6.63918  |
| H    | 34 | 0.23671        | 0.00000            | 0.75874  | 0.00455 | 0.76329  |
| H    | 35 | 0.21754        | 0.00000            | 0.78019  | 0.00227 | 0.78246  |
| H    | 36 | 0.22054        | 0.00000            | 0.77681  | 0.00264 | 0.77946  |
| C    | 37 | -0.63208       | 1.99920            | 4.62419  | 0.00868 | 6.63208  |
| H    | 38 | 0.22285        | 0.00000            | 0.77465  | 0.00250 | 0.77715  |
| H    | 39 | 0.22238        | 0.00000            | 0.77489  | 0.00273 | 0.77762  |
| H    | 40 | 0.21882        | 0.00000            | 0.77883  | 0.00235 | 0.78118  |
| C    | 41 | -0.63870       | 1.99920            | 4.63057  | 0.00894 | 6.63870  |
| H    | 42 | 0.21727        | 0.00000            | 0.78046  | 0.00227 | 0.78273  |
| H    | 43 | 0.24018        | 0.00000            | 0.75608  | 0.00374 | 0.75982  |
| H    | 44 | 0.22042        | 0.00000            | 0.77702  | 0.00256 | 0.77958  |
| C    | 45 | 0.15381        | 1.99868            | 3.82519  | 0.02232 | 5.84619  |
| C    | 46 | -0.03488       | 1.99879            | 4.02041  | 0.01568 | 6.03488  |
| C    | 47 | -0.22075       | 1.99882            | 4.20739  | 0.01454 | 6.22075  |
| H    | 48 | 0.21474        | 0.00000            | 0.78236  | 0.00290 | 0.78526  |
| C    | 49 | -0.03121       | 1.99884            | 4.01717  | 0.01520 | 6.03121  |
| C    | 50 | -0.21631       | 1.99882            | 4.20279  | 0.01470 | 6.21631  |
| H    | 51 | 0.21325        | 0.00000            | 0.78381  | 0.00294 | 0.78675  |
| C    | 52 | -0.02952       | 1.99879            | 4.01503  | 0.01569 | 6.02952  |
| C    | 53 | -0.63929       | 1.99920            | 4.63120  | 0.00889 | 6.63929  |
| H    | 54 | 0.23603        | 0.00000            | 0.75932  | 0.00465 | 0.76397  |
| H    | 55 | 0.21776        | 0.00000            | 0.77997  | 0.00228 | 0.78224  |
| H    | 56 | 0.22045        | 0.00000            | 0.77689  | 0.00266 | 0.77955  |
| C    | 57 | -0.63077       | 1.99920            | 4.62294  | 0.00864 | 6.63077  |
| H    | 58 | 0.21852        | 0.00000            | 0.77913  | 0.00235 | 0.78148  |
| H    | 59 | 0.22288        | 0.00000            | 0.77424  | 0.00288 | 0.77712  |

## Supplementary Material (ESI) for Chemical Communications

This journal is (c) The Royal Society of Chemistry 2010

|   |     |          |         |         |         |         |
|---|-----|----------|---------|---------|---------|---------|
| H | 60  | 0.22215  | 0.00000 | 0.77534 | 0.00251 | 0.77785 |
| C | 61  | -0.63930 | 1.99920 | 4.63118 | 0.00893 | 6.63930 |
| H | 62  | 0.24011  | 0.00000 | 0.75607 | 0.00382 | 0.75989 |
| H | 63  | 0.22069  | 0.00000 | 0.77676 | 0.00255 | 0.77931 |
| H | 64  | 0.21747  | 0.00000 | 0.78025 | 0.00228 | 0.78253 |
| C | 65  | 0.32764  | 1.99894 | 3.65210 | 0.02132 | 5.67236 |
| C | 66  | -0.42271 | 1.99886 | 4.40705 | 0.01679 | 6.42271 |
| H | 67  | 0.21800  | 0.00000 | 0.77941 | 0.00259 | 0.78200 |
| C | 68  | 0.32791  | 1.99894 | 3.65183 | 0.02132 | 5.67209 |
| C | 69  | -0.65999 | 1.99919 | 4.65331 | 0.00749 | 6.65999 |
| H | 70  | 0.23612  | 0.00000 | 0.76146 | 0.00242 | 0.76388 |
| H | 71  | 0.22603  | 0.00000 | 0.77198 | 0.00199 | 0.77397 |
| H | 72  | 0.23539  | 0.00000 | 0.76218 | 0.00243 | 0.76461 |
| C | 73  | -0.66008 | 1.99919 | 4.65339 | 0.00749 | 6.66008 |
| H | 74  | 0.23654  | 0.00000 | 0.76105 | 0.00240 | 0.76346 |
| H | 75  | 0.22599  | 0.00000 | 0.77201 | 0.00199 | 0.77401 |
| H | 76  | 0.23518  | 0.00000 | 0.76237 | 0.00245 | 0.76482 |
| C | 77  | 0.15420  | 1.99868 | 3.82480 | 0.02231 | 5.84580 |
| C | 78  | -0.03006 | 1.99878 | 4.01553 | 0.01575 | 6.03006 |
| C | 79  | -0.21626 | 1.99882 | 4.20285 | 0.01458 | 6.21626 |
| H | 80  | 0.21440  | 0.00000 | 0.78251 | 0.00309 | 0.78560 |
| C | 81  | -0.03230 | 1.99884 | 4.01826 | 0.01520 | 6.03230 |
| C | 82  | -0.21942 | 1.99882 | 4.20585 | 0.01475 | 6.21942 |
| H | 83  | 0.21419  | 0.00000 | 0.78287 | 0.00293 | 0.78581 |
| C | 84  | -0.03449 | 1.99879 | 4.02008 | 0.01562 | 6.03449 |
| C | 85  | -0.63849 | 1.99920 | 4.63036 | 0.00893 | 6.63849 |
| H | 86  | 0.22052  | 0.00000 | 0.77692 | 0.00256 | 0.77948 |
| H | 87  | 0.21762  | 0.00000 | 0.78010 | 0.00227 | 0.78238 |
| H | 88  | 0.23930  | 0.00000 | 0.75693 | 0.00377 | 0.76070 |
| C | 89  | -0.63277 | 1.99920 | 4.62489 | 0.00868 | 6.63277 |
| H | 90  | 0.21844  | 0.00000 | 0.77924 | 0.00232 | 0.78156 |
| H | 91  | 0.22388  | 0.00000 | 0.77356 | 0.00255 | 0.77612 |
| H | 92  | 0.22265  | 0.00000 | 0.77468 | 0.00268 | 0.77735 |
| C | 93  | -0.63911 | 1.99920 | 4.63101 | 0.00890 | 6.63911 |
| H | 94  | 0.21767  | 0.00000 | 0.78006 | 0.00227 | 0.78233 |
| H | 95  | 0.22065  | 0.00000 | 0.77670 | 0.00265 | 0.77935 |
| H | 96  | 0.23623  | 0.00000 | 0.75918 | 0.00459 | 0.76377 |
| C | 97  | 0.15403  | 1.99868 | 3.82499 | 0.02230 | 5.84597 |
| C | 98  | -0.02913 | 1.99879 | 4.01462 | 0.01572 | 6.02913 |
| C | 99  | -0.21793 | 1.99882 | 4.20448 | 0.01464 | 6.21793 |
| H | 100 | 0.21346  | 0.00000 | 0.78362 | 0.00292 | 0.78654 |
| C | 101 | -0.03162 | 1.99884 | 4.01759 | 0.01518 | 6.03162 |
| C | 102 | -0.22047 | 1.99882 | 4.20703 | 0.01461 | 6.22047 |
| H | 103 | 0.21463  | 0.00000 | 0.78246 | 0.00291 | 0.78537 |
| C | 104 | -0.03403 | 1.99879 | 4.01956 | 0.01569 | 6.03403 |
| C | 105 | -0.63108 | 1.99920 | 4.62325 | 0.00863 | 6.63108 |
| H | 106 | 0.22054  | 0.00000 | 0.77701 | 0.00244 | 0.77946 |
| H | 107 | 0.21997  | 0.00000 | 0.77764 | 0.00240 | 0.78003 |
| H | 108 | 0.22318  | 0.00000 | 0.77398 | 0.00284 | 0.77682 |
| C | 109 | -0.63959 | 1.99920 | 4.63145 | 0.00894 | 6.63959 |
| H | 110 | 0.22056  | 0.00000 | 0.77689 | 0.00255 | 0.77944 |
| H | 111 | 0.21751  | 0.00000 | 0.78022 | 0.00228 | 0.78249 |
| H | 112 | 0.24091  | 0.00000 | 0.75531 | 0.00378 | 0.75909 |
| C | 113 | -0.63943 | 1.99920 | 4.63134 | 0.00888 | 6.63943 |
| H | 114 | 0.22043  | 0.00000 | 0.77691 | 0.00265 | 0.77957 |
| H | 115 | 0.23666  | 0.00000 | 0.75873 | 0.00461 | 0.76334 |
| H | 116 | 0.21762  | 0.00000 | 0.78011 | 0.00227 | 0.78238 |
| H | 117 | 0.11713  | 0.00000 | 0.87830 | 0.00457 | 0.88287 |
| H | 118 | 0.11700  | 0.00000 | 0.87845 | 0.00454 | 0.88300 |

Supplementary Material (ESI) for Chemical Communications

This journal is (c) The Royal Society of Chemistry 2010
